# Supplementary material
Source: PubMed Central journal article supplement (PMC17216)
Supplement: pnas_97_21_11427__2.pdf [file pnas_97_21_11427__2.pdf]

## BLOCK A

dTEP1 LYIQSDKATYKPGDKIQFRVLFLDKNTRP  
dTEP2 VVQTDKATYKPADLVQFRILFLDENTRP  
dTEP3 VLVQTDKSIYKPGDLVHYRVLILDANLKP  
dTEP4 IKIQTDKGYKPGDTINYRVIFLDENLRP  
h 2-M VVQTDKSIYKPGQTVKFRVVSMDENFHP  
hc3 LFIQTDKTIYTPGSTVLYRIFTVNHKLLP

## BLOCK D

dTEP1 RKLFPETWLF  
dTEP2-A RKNFADVWIW  
dTEP2-B RTNFAEVMMW  
dTEP2-C RKEFPENWIF  
dTEP2-D RKEFPENWIF  
dTEP2-E RKEFPETWFF  
dTEP4 RKNFAETWIF  
h 2-M RKYFPETWIW  
hc3 RSEFPESWLW

## BLOCK G

dTEP1 LVHLPCCGCEQNMFNVPVPSILALSYLKAKNRQ  
dTEP2 LVRMPYCGCEQNMVNFVFNILVLRKYLEVTGRK  
dTEP3 LILLPYCGCEQTMVNFVFNILVLRKYLEVTGRK  
dTEP4 LLRLPSGCGEQTMKSLVFPNVLVLRDYLKSIKKL  
h 2-M LLQMPYCGCEQNMVLFAPNIYVLDYLNQEQQL  
hc3 LIVTPSGCGEQNMIGMTPVIAVRYLDETEQW

## BLOCK J

dTEP1 IVDWLISKRNSNGGFVSSQDTVVGIMALTKY  
dTEP2 IIKWLISQRNSNGGFSSTQDTVIGLQALTKF  
dTEP3 VLNWLMQQRNFKGGFVASSQDTVVGALQALMF  
dTEP4 TVRWLIAQRNFGGFFASSQDTVVGALQALMF  
h 2-M IVRWLITQRNAGGFFSSTQDTVVALHALSKY  
hc3 VVRWLNQRYYGGYGGSTQATFMVVFQALAQY

## BLOCK B

dTEP1 LVVDKYVVPKFEV  
dTEP2 FEVDKYVLPKFEV  
dTEP3 FEILDHILPKFVV  
dTEP4 FEVEKYVLPKYSV  
h 2-M FTVEEFVLPKFEV  
hc3 FEVEKYVLPKFEV

## BLOCK E

dTEP1 VPDTLTSWVITGFSLSPOQSGL  
dTEP2 IPDTITSWVVTGFSLNPTSGI  
dTEP3 IPSEMTSWVVSFAFALDPVNGL  
dTEP4 IPDTITNWWVTGFSLHPQKGL  
h 2-M VPDTITTEWKAGAFCLSEDAGL  
hc3 LKDSITTEWELAVSMSDKKGI

## BLOCK H

dTEP1 STWLTAYVIRSF  
dTEP2 STWLTAYVMRSF  
dTEP3 STWLTAYVARSL  
dTEP4 STWLTAYVLRSF  
h 2-M NTWLTAFVLRKF  
hc3 STWLTAYVVKVF

## BLOCK K

dTEP1 TNMALMQVQLPSGYVCDIEPFADI  
dTEP2 SNMAVMEIALPSGFVGDSTSLGKI  
dTEP3 SNMAVMEVHLPVGFVDRDITLPTL  
dTEP4 SGMVAVLDVAIPTGYWIQQKLDY  
h 2-M SNMSIVDVKVMVSGFIPLKPTVKML  
hc3 ATMSILDISMMTGFAPDITDDLKQL

## BLOCK C

dTEP1 IRATIKARYTFKKPKVKG  
dTEP2 IKATIRAKYTYGKPKVKG  
dTEP3 IAATVRAHYAFGQPIVG  
dTEP4 FNVVLKANYTYGKPVNG  
h 2-M MNVSVCGLYTYGKPVPG  
hc3 LEVITITRFLYTGKKEVG

## BLOCK F

dTEP1 VFQPPFITTNLPYSVKRGEVIAIPVIVFNY  
dTEP2 VFQPPFVSTNLPYSVKRGEVIAIPVIVFNY  
dTEP3 AYKEFYISTELPYSIKRDELIAIPVIVHNN  
dTEP4 TFQPPFVSVRLPYSVKRGEVINVPALVFN  
h 2-M APQPPFVDELMPYSVIRGEAFTLKKATVLNY  
hc3 VMQPPFIDLRLPYSVVRNEQVEIRAVLNY

## BLOCK I

dTEP1 FLVSRQSTDGKFKELGMVIHNSHGSP  
dTEP2 FLVSKQKESGEPFVGLKLPDANQNP  
dTEP3 YLGSVQANGCFEERGVDFERFGDDGI  
dTEP4 FLLTRQANGSFEHGEVYFYSSQRSL  
h 2-M WLSQRQKDNCGFRSSGSLLNNAIKGGV  
hc3 LILEKQKPDGVQEDAPVHQEMIGGL

## BLOCK L

dTEP1 LEAIYTHAVANLKPSPWRVLYDYATERSATEFY  
dTEP2 LEASKTHAVAKQKSPASVSLYDYDTERKATEFY  
dTEP3 LHAYKTVKVKHRPVAVVMYDYDSARRARQFY  
dTEP4 IEAYRTHAVANQKPSVVLVYDYDTNKKATEFY  
h 2-M FTVLQDVFVRDLKPAIVKVVYDYETDEFAIAEY  
hc3 FKVHQYFNVELIQPGAVKVVYAYNLEESCTRFY
